# Supplementary material for: 3D Printable Soft Sensory Fiber Networks for Robust and Complex Tactile Sensing
Source: MDPI journal article supplement (doi:10.3390/mi13091540), 2022-09-17
Supplement: s1 [file s1]

**Table S1.** Key differences between the two works compared in Figure 8.

|                            | <b>This Work</b>                                  | <b>Thuruthel et al. [30]</b>              |
|----------------------------|---------------------------------------------------|-------------------------------------------|
| <b>Sensor material</b>     | Styrene-based tri-block co-polymer & carbon black | Conductive thermoplastic elastomer (CTPE) |
| <b>Substrate material</b>  | Styrene-based tri-block co-polymer                | EcoFlex 00-20                             |
| <b>Fabrication method</b>  | 3D printing                                       | Manual positioning & casting              |
| <b>Thickness (mm)</b>      | 0.3 → 1.2                                         | 10                                        |
| <b>Grid size</b>           | 4 × 4                                             | 4 × 4                                     |
| <b>Probed area (mm)</b>    | 27 × 27                                           | 33.75 × 33.75                             |
| <b>Probe diameter (mm)</b> | 5                                                 | 7.5                                       |
| <b>Depth probed (mm)</b>   | 2                                                 | 4                                         |
| <b>Number of samples</b>   | 5000                                              | 7400                                      |
| <b>Hidden layer size</b>   | 100                                               | 50                                        |

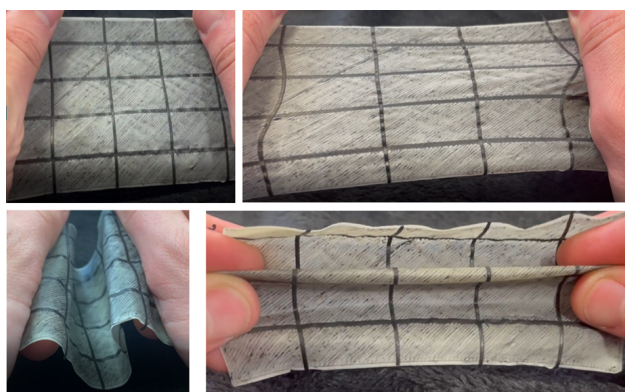

**Figure S1.** Flexibility and stretchability of a 0.3mm printed sensor grid.

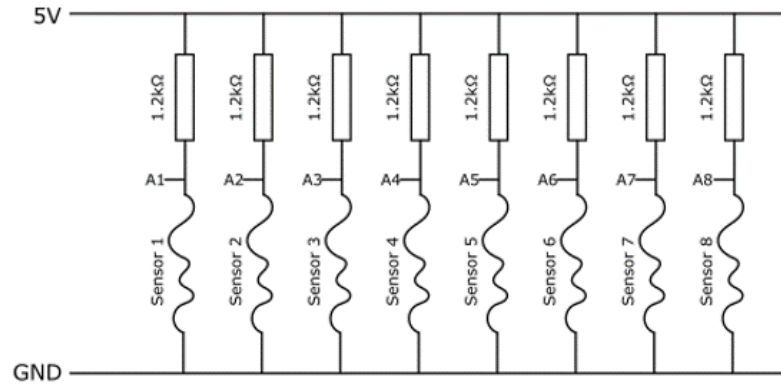

**Figure S2.** A schematic of the resistive sensing setup, which consists of 8 potential dividers in parallel. The GND & 5V outputs and the analog inputs are all connected to a microcontroller. In this schematic the sensors are assumed separate, though some channels in the optimized print are in contact. This introduces additional resistances between the 8 branches, the effect of which can quickly be learned by the neural networks.
